# Supplementary material for: Distinguishing Signal From Noise in Immunopeptidome Studies of Limiting-Abundance Biological Samples: Peptides Presented by I-Ab in C57BL/6 Mouse Thymus
Source: Front Immunol. 2021 Apr 29;12:658601. doi: 10.3389/fimmu.2021.658601 (PMC8116589; doi:10.3389/fimmu.2021.658601)
Supplement: Supplementary file 6 [file Table_5.xlsx]

## Sheet: Index
Supplementary Table S5. Experimental I-Ab binding affinity IC50 values for the differentially expressed peptides. Three independent experiments were performed and mean ± SD are tabulated.
Sheet 2 (splenic B cells only and splenic B cells > thymus)
Experimentally calculated IC50 values for 1) core epitopes present in all three biological samples of splenic B cells only and 2) core epitopes present in higher abundances in splenic B cells as compared to thymic cells (atleast 2 fold different).
Sheet 3 (Thymic cells only and thymic cells > splenic B cells)
Experimentally calculated IC50 values for 1) core epitopes present in atleast three biological samples of thymic cells only and 2) core epitopes present in higher abundances in thymic cells cells as compared to splenic B cells (atleast 2 fold different).
Sheet 4 (Thymic cells and splenic B cells)
Experimentally calculated IC50 values for core epitopes present in all four biological samples of thymic cells only and all three samples of splenic B cells, with less than 2 fold difference

## Sheet: B cells only and B cell>Thymus
Supplementary Table S5. Experimental IC50 values for the differentially expressed core epitopes (present in three biological samples of splenic B cells only and the core epitopes present in higher abundances in splenic B cells than thymus, at least 2 fold) tested for the binding affinity. Three independent experiments were performed and mean ± SD are tabulated.
Protein Name	Peptide Sequence	Core epitope	Avg-T1	Avg-T2	Avg-T3	Avg-T4	Avg-B1	Avg-B2	Avg-B3	Avg-T	Avg-B	Avg-B/T	Mean IC50 (nM)	Std. Deviation
sp|P20029|GRP78_MOUSE 78 kDa glucose-regulated protein OS=Mus musculus GN=Hspa5 PE=1 SV=3	ITPSYVAFTPEGERL	YVAFTPEGE	42473800	0	9.6153e+06	0	3.08704e+08	2.14732e+08	1.55575e+08	1.30223e+07	2.26337e+08	17.3808	1887	986.4
sp|P08226|APOE_MOUSE Apolipoprotein E OS=Mus musculus GN=Apoe PE=1 SV=2	TNPIITPVAQENQ	TNPIITPVA	60275000	17731300	21134500	11471300	567027100	681307700	664115100	27653025	637483300	23.0529	1740	1216
sp|P60710|ACTB_MOUSE Actin, cytoplasmic 1 OS=Mus musculus GN=Actb PE=1 SV=1	ISKQEYDESGPSIVHR	YDESGPSIV	12727900	0	0	4214010	3.5382e+08	2.13591e+08	2.24283e+08	4.23548e+06	2.63898e+08	62.3066	15154	6253
sp|Q9D7I0-2|SHSA5_MOUSE Isoform 2 of Protein shisa-5 OS=Mus musculus GN=Shisa5	GPPPYHESLAGASQPP	YHESLAGAS	8804170	0	0	0	168367020	1.69368e+08	158316800	2.20104e+06	1.65351e+08	75.1238	1502	1449
sp|Q8R0W6|NFIP1_MOUSE NEDD4 family-interacting protein 1 OS=Mus musculus GN=Ndfip1 PE=1 SV=1	FPKPPSYNVATTLPSYDE	YNVATTLPS	48930300	0	18094500	0	1.81467e+09	1.20428e+09	1.50704e+09	16756200	1.50866e+09	90.036	230.9	180.8
sp|O88307|SORL_MOUSE Sortilin-related receptor OS=Mus musculus GN=Sorl1 PE=1 SV=3	GIDPYDQPNAIYIER	YDQPNAIYI	0	6702695	0	0	253024550	37288200	3.47665e+08	1.67567e+06	2.12659e+08	126.91	167.1	60.74
sp|P01027|CO3_MOUSE Complement C3 OS=Mus musculus GN=C3 PE=1 SV=3	qQLAFKQPSSAYAAFN	KQPSSAYAA	0	6702695	0	0	253024550	37288200	3.47665e+08	1.67567e+06	2.12659e+08	126.91	169.7	175.6
sp|P17156|HSP72_MOUSE Heat shock-related 70 kDa protein 2 OS=Mus musculus GN=Hspa2 PE=1 SV=2	NVLRIINEPTAAAIA	NEPTAAAIA	0	0	9135930	0	584932400	156459000	201094600	2.28398e+06	314162000	137.55	337.4	60.95
sp|P01887|B2MG_MOUSE Beta-2-microglobulin OS=Mus musculus GN=B2m PE=1 SV=2	YVTQFHPPHIEIQ	FHPPHIEIQ	13814335	0	15434300	0	1.04571e+09	6.62435e+08	2.32223e+09	7.31216e+06	1.34346e+09	183.729	1066	1180
sp|P14483|HB2A_MOUSE H-2 class II histocompatibility antigen, A beta chain OS=Mus musculus GN=H2-Ab1 PE=1 SV=1	HNYEGPETHTSLRRL	YEGPETHTS	5253280	0	35643400	0	3.53382e+09	1.69931e+09	3.89044e+09	10224170	3.04119e+09	297.451	796.6	960.9
tr|A0A075B6A0|A0A075B6A0_MOUSE Ig mu chain C region (Fragment) OS=Mus musculus GN=Ighm PE=1 SV=2	LPQEKYVTSAPMPEPG	YVTSAPMPE	26563650	0	0	8473470	1.24267e+10	1.28922e+10	1.27396e+10	8759280	1.26861e+10	1448.31	561.6	600
sp|O09046-2|OXLA_MOUSE Isoform 2 of L-amino-acid oxidase OS=Mus musculus GN=Il4i1	GALLLNAPVVSITQGR	LLLNAPVVS	0	0	0	0	1821031700	1.05814e+09	124854650	0	1.00134e+09		1665	2171
sp|O09126|SEM4D_MOUSE Semaphorin-4D OS=Mus musculus GN=Sema4d PE=1 SV=2	GRKFVYAGSNSGVVQ	FVYAGSNSG	0	0	0	0	2.12007e+08	268421700	185239080	0	2.21889e+08		1480	1026
sp|O88307|SORL_MOUSE Sortilin-related receptor OS=Mus musculus GN=Sorl1 PE=1 SV=3	RVLIPYQGPSSDYVVVK	YQGPSSDYV	0	0	0	0	1.01405e+09	5.89022e+08	725574950	0	7.76216e+08		274.6	190.3
sp|P01029|CO4B_MOUSE Complement C4-B OS=Mus musculus GN=C4b PE=1 SV=3	ARYIYGKPVQGVAYTR	YIYGKPVQG	0	0	0	0	299374600	2.61325e+08	188051110	0	2.49584e+08		153.3	16.33
sp|P07724|ALBU_MOUSE Serum albumin OS=Mus musculus GN=Alb PE=1 SV=3	LVRYTQKAPQVSTPTLV	PQVSTPTLV	0	0	0	0	43537000	7.41141e+08	327844900	0	3.70841e+08		764.7	1040
sp|P11911|CD79A_MOUSE B-cell antigen receptor complex-associated protein alpha chain OS=Mus musculus GN=Cd79a PE=1 SV=2	GTTGQLFFPEVNKNHR	LFFPEVNKN	0	0	0	0	1.44458e+10	9.71914e+09	9.1731e+09	0	1.11127e+10		2639	2417
sp|P11911|CD79A_MOUSE B-cell antigen receptor complex-associated protein alpha chain OS=Mus musculus GN=Cd79a PE=1 SV=2	PGQGTTGQLFFPEVNKN	LFFPEVNKN	0	0	0	0	1.44458e+10	9.71914e+09	9.1731e+09	0	1.11127e+10		2904	1568
sp|P13020-2|GELS_MOUSE Isoform 2 of Gelsolin OS=Mus musculus GN=Gsn	AMLQVLGPKPALPEG	LQVLGPKPA	0	0	0	0	1.44065e+08	1.09336e+08	1.19403e+08	0	1.24268e+08		1175	1248
sp|P13020-2|GELS_MOUSE Isoform 2 of Gelsolin OS=Mus musculus GN=Gsn	AAYLWVGAGASEAEKT	WVGAGASEA	0	0	0	0	194313000	7.2868e+08	6.89812e+08	0	5.37602e+08		275.6	251.2
sp|P14483|HB2A_MOUSE H-2 class II histocompatibility antigen, A beta chain OS=Mus musculus GN=H2-Ab1 PE=1 SV=1	SLRRLEQPNVVISLSR	LEQPNVVIS	0	0	0	0	1.75512e+09	4.35552e+08	8.32978e+08	0	1.00788e+09		93.83	51.15
sp|P21855|CD72_MOUSE B-cell differentiation antigen CD72 OS=Mus musculus GN=Cd72 PE=1 SV=2	DGELTYENVQVSPVPGGPP	YENVQVSPV	0	0	0	0	1090309850	1.34945e+09	1.38041e+09	0	1.27339e+09		1360	650.2
sp|P28665|MUG1_MOUSE Murinoglobulin-1 OS=Mus musculus GN=Mug1 PE=1 SV=3	LEISYTGSRPASNmV	YTGSRPASN	0	0	0	0	1493207000	675272880	843797430	0	1.00409e+09		349.4	229.3
sp|P28665|MUG1_MOUSE Murinoglobulin-1 OS=Mus musculus GN=Mug1 PE=1 SV=3	GKYTYGKPVPGHVKI	YTYGKPVPG	0	0	0	0	206135470	84957200	45162100	0	1.12085e+08		398.8	72.41
sp|P97825|HN1_MOUSE Hematological and neurological expressed 1 protein OS=Mus musculus GN=Hn1 PE=1 SV=3	EKPVPAAPVPSPVAPAP	PVPAAPVPS	0	0	0	0	36903100	21610500	37132855	0	3.18822e+07		1136	1030
sp|Q08481-4|PECA1_MOUSE Isoform 4 of Platelet endothelial cell adhesion molecule OS=Mus musculus GN=Pecam1	KPSIFHDAKSEIIKGHA	FHDAKSEII	0	0	0	0	2.82884e+08	1.28849e+08	139058950	0	183597250		4964	1372
sp|Q62312|TGFR2_MOUSE TGF-beta receptor type-2 OS=Mus musculus GN=Tgfbr2 PE=1 SV=1	VGTARYMAPEVLESR	YMAPEVLES	0	0	0	0	17718000	52019300	14566200	0	2.81012e+07		196.8	122.1
sp|Q62312|TGFR2_MOUSE TGF-beta receptor type-2 OS=Mus musculus GN=Tgfbr2 PE=1 SV=1	VGTARYMAPEVLESRM	YMAPEVLES	0	0	0	0	17718000	52019300	14566200	0	2.81012e+07		305.8	299.8
sp|Q64697|PTCA_MOUSE Protein tyrosine phosphatase receptor type C-associated protein OS=Mus musculus GN=Ptprcap PE=1 SV=1	SDLHAFSGSAAWDDSAG	FSGSAAWDD	0	0	0	0	1.96605e+08	3.02835e+08	2.87318e+08	0	2.62253e+08		1923	1785
sp|Q64697|PTCA_MOUSE Protein tyrosine phosphatase receptor type C-associated protein OS=Mus musculus GN=Ptprcap PE=1 SV=1	SDLHAFSGSAAWDDS	FSGSAAWDD	0	0	0	0	1.96605e+08	3.02835e+08	2.87318e+08	0	2.62253e+08		1094	478.1
sp|Q8VD58|EVI2B_MOUSE Protein EVI2B OS=Mus musculus GN=Evi2b PE=1 SV=1	KPTVTVVSPLPNDSINPQP	VTVVSPLPN	0	0	0	0	353464750	154784150	1.17628e+08	0	2.08626e+08		2249	592.6
sp|Q920A5|RISC_MOUSE Retinoid-inducible serine carboxypeptidase OS=Mus musculus GN=Scpep1 PE=1 SV=2	KWKALYTDPKSSETA	ALYTDPKSS	0	0	0	0	2.17444e+09	900894000	1090212300	0	1.38852e+09		3446	2449
sp|Q99LJ1|FUCO_MOUSE Tissue alpha-L-fucosidase OS=Mus musculus GN=Fuca1 PE=1 SV=1	GIVNLKSPKTTSATKI	LKSPKTTSA	0	0	0	0	5.28728e+07	20845990	1.72746e+07	0	3.03312e+07		12793	16705
sp|Q9D8I1|MZB1_MOUSE Marginal zone B- and B1-cell-specific protein OS=Mus musculus GN=Mzb1 PE=1 SV=2	IYEAYRQGQANLEAL	YRQGQANLE	0	0	0	0	1.06585e+08	71614135	70734700	0	8.29779e+07		1367	478
tr|A0A075B5P8|A0A075B5P8_MOUSE Protein Ighv2-2 (Fragment) OS=Mus musculus GN=Ighv2-2 PE=4 SV=1	GGSTDYNAAFISRLS	YNAAFISRL	0	0	0	0	29933400	53110315	6.70408e+07	0	5.00282e+07		4957	1377
tr|A0A075B6A3|A0A075B6A3_MOUSE Protein Igha (Fragment) OS=Mus musculus GN=Igha PE=1 SV=1	KDITTVNFPPALASGGG	VNFPPALAS	0	0	0	0	6.01536e+08	177591220	2.66508e+08	0	3.48545e+08		969.8	421.7
tr|A0A1B0GS59|A0A1B0GS59_MOUSE Complement receptor type 2 OS=Mus musculus GN=Cr2 PE=4 SV=1	LLPKYSFAKPSIVSDK	YSFAKPSIV	0	0	0	0	3.57957e+09	1.72716e+09	2.05807e+09	0	2.45493e+09		178.9	114.1
tr|E0CX78|E0CX78_MOUSE Fc receptor-like A (Fragment) OS=Mus musculus GN=Fcrla PE=1 SV=1	GPGSREAASPVAITVQE	REAASPVAI	0	0	0	0	8.75247e+07	6.87271e+07	66461150	0	7.42376e+07		466.5	343.8
tr|E9PV93|E9PV93_MOUSE T-lymphocyte surface antigen Ly-9 OS=Mus musculus GN=Ly9 PE=1 SV=1	HLNTYDGSHTLRVSQS	YDGSHTLRV	0	0	0	0	100271110	1.00853e+08	43505000	0	8.15429e+07		1359	1037
tr|E9Q5L2|E9Q5L2_MOUSE Inter alpha-trypsin inhibitor, heavy chain 4 OS=Mus musculus GN=Itih4 PE=1 SV=1	AGKLQDQGPDVLLAKVS	DQGPDVLLA	0	0	0	0	300840750	170409800	38847500	0	1.70033e+08		377.7	169.8
tr|F6YBV1|F6YBV1_MOUSE CCR4-NOT transcription complex subunit 3 (Fragment) OS=Mus musculus GN=Cnot3 PE=1 SV=1	APTSALGPKASPAPS	ALGPKASPA	0	0	0	0	16605170	2.11198e+07	33936250	0	2.38871e+07		2300	2898
tr|O88325|O88325_MOUSE Alpha-N-acetylglucosaminidase OS=Mus musculus GN=Naglu PE=1 SV=1	IRRYGVSQPDAVAAWK	YGVSQPDAV	0	0	0	0	67761950	19615500	22561600	0	36646350		249.5	3.536
tr|Q3UP36|Q3UP36_MOUSE B-cell receptor CD22 OS=Mus musculus GN=Cd22 PE=1 SV=1	NDWTVDHPQTLFAWEG	YGVSQPDAV	0	0	0	0	67761950	19615500	22561600	0	36646350		445.3	577.9
tr|Q3UP36|Q3UP36_MOUSE B-cell receptor CD22 OS=Mus musculus GN=Cd22 PE=1 SV=1	AKLDVHYAPKAVTTVIQ	HYAPKAVTT	0	0	0	0	926468100	248332500	124819800	0	433206800		380.9	271.8
tr|Q80ZE3|Q80ZE3_MOUSE Protein Siglecg OS=Mus musculus GN=Siglecg PE=1 SV=1	QVLSWSSPVGSRTLA	LSWSSPVGS	0	0	0	0	107912300	7.57801e+07	66374630	0	8.33557e+07		152.4	64.13
tr|Q8C4F9|Q8C4F9_MOUSE E3 ubiquitin-protein ligase RNF13 OS=Mus musculus GN=Rnf13 PE=1 SV=1	AQRAGYKAAIVHNVDS	YKAAIVHNV	0	0	0	0	32265400	4.41314e+07	80458300	0	5.2285e+07		2419	1672

## Sheet: Thymus only and thymus>B cells
Supplementary Table S5. Experimental IC50 values for the differentially expressed core epitopes (present in at least three biological samples of thymus only and the core epitopes present in higher abundances in thymus than in splenic B cells, at least 2 fold) tested for the binding affinity. Three independent experiments were performed and mean ± SD are tabulated.
Protein Name	Peptide Sequence	Core epitope	Avg-T1	Avg-T2	Avg-T3	Avg-T4	Avg-B1	Avg-B2	Avg-B3	Avg-T	Avg-B	Ratio-Avg T/B	Mean IC50 (nM)	Std. Deviation
sp|O70250|PGAM2_MOUSE Phosphoglycerate mutase 2 OS=Mus musculus GN=Pgam2 PE=1 SV=3	LNLPTGIPIVYEL	NLPTGIPIV	16892180	24718800	180273720	254209700	0	0	129255600	119023600	43085200	2.76252	54429	26816	13
sp|Q61753|SERA_MOUSE D-3-phosphoglycerate dehydrogenase OS=Mus musculus GN=Phgdh PE=1 SV=3	AGTGVDNVDLEAATR	VDNVDLEAA	0	2.84723e+07	12801900	5529295	0	3353540	7758895	1.17009e+07	3704145	3.15886	57525	41250	15
sp|O70370|CATS_MOUSE Cathepsin S OS=Mus musculus GN=Ctss PE=1 SV=2	YSMGMHTYQVG	SMGMHTYQV	1.71921e+09	1.1859e+09	1192293740	0	8.81913e+07	57878400	45493490	1.02435e+09	6.38544e+07	16.042	74072	16237	11
tr|Q5SQB5|Q5SQB5_MOUSE Nucleophosmin OS=Mus musculus GN=Npm1 PE=1 SV=1	VEEDAESEDEDEEDVKLLGMSGK	VKLLGMSGK	0	3.71244e+08	8.1362e+07	88349905	0	55228700	4.88045e+07	135238895	3.46777e+07	3.89988	111308	157343	23
sp|P17182|ENOA_MOUSE Alpha-enolase OS=Mus musculus GN=Eno1 PE=1 SV=3	HIADLAGNPEVILPVPA	PEVILPVPA	11393800	0	3241840	5542150	0	0	0	2.88254e+06	0		13925	11191	17
tr|A6ZI44|A6ZI44_MOUSE Fructose-bisphosphate aldolase OS=Mus musculus GN=Aldoa PE=1 SV=1	PHPYPALTPEQKKELSDIAHRIVAPGKG	PYPALTPEQ	24345380	0	22860980	2.60586e+08	0	0	0	4.39704e+07	0		10851	9157	28
sp|P17182|ENOA_MOUSE Alpha-enolase OS=Mus musculus GN=Eno1 PE=1 SV=3	PSRYITPDQLADLYK	SRYITPDQL	93202200	0	33900220	36194740	0	0	0	2.33282e+07	0		2912	924.9	15
sp|Q80YX1|TENA_MOUSE Tenascin OS=Mus musculus GN=Tnc PE=1 SV=1	ATVSWRAPTAQVESFR	WRAPTAQVE	468767950	6476870	58808700	2.85415e+07	0	0	0	8.03707e+07	0		406.9	370.9	16
sp|O09114-2|PTGDS_MOUSE Isoform 2 of Prostaglandin-H2 D-isomerase OS=Mus musculus GN=Ptgds	APGHYTYSSPHSGSIH	YTYSSPHSG	35978050	0	5575425	5194160	0	0	0	6.67823e+06	0		1583	1438	16

## Sheet: Thymus and splenic B cells
Supplementary Table S5. Experimental IC50 values for the core epitopes present in all the four biological samples of thymus and the core epitopes present in all the three biological replicates of splenic B cells, and the fold difference of <2 fold were tested for the binding affinity. Three independent experiments were performed and mean ± SD are tabulated.
Protein Name	Peptide sequence	Predicted core	Avg-T1	Avg-T2	Avg-T3	Avg-T4	Avg-B1	Avg-B2	Avg-B3	Avg-T	Avg-B	Ratio-Avg B/T	Mean IC50 (nM)	Std. Deviation
sp|P11499|HS90B_MOUSE Heat shock protein HSP 90-beta OS=Mus musculus GN=Hsp90ab1 PE=1 SV=3	LSSGFSLEDPQTHSNRIY	FSLEDPQTH	6.20101e+07	167504320	1.60029e+08	1.95498e+08	80715700	1.15257e+08	104966900	1.4626e+08	1.00313e+08	0.685853	13309	161.9
sp|Q64525|H2B2B_MOUSE Histone H2B type 2-B OS=Mus musculus GN=Hist2h2bb PE=1 SV=3	LPGELAKHAVSEGTKA	AKHAVSEGT	2366525750	110307550	1.17648e+09	971883050	1.17934e+09	389840000	550967950	1.1563e+09	7.06714e+08	0.611186	31985	44116
sp|P62806|H4_MOUSE Histone H4 OS=Mus musculus GN=Hist1h4a PE=1 SV=2	RQGRTLYGFGG	GRTLYGFGG	7.75728e+07	166032700	98093500	1.26983e+08	103810700	113684800	116655300	1.17171e+08	111383600	0.950611	81203	6976
sp|P22752|H2A1_MOUSE Histone H2A type 1 OS=Mus musculus GN=Hist1h2ab PE=1 SV=3	RVTIAQGGVLPNIQ	IAQGGVLPN	3.50652e+09	2.00438e+08	9.79773e+08	8.0768e+08	2.51786e+09	16630920	87749800	1.3736e+09	8.74081e+08	0.636342	25988	32813
sp|P27661|H2AX_MOUSE Histone H2AX OS=Mus musculus GN=H2afx PE=1 SV=2	AVLLPKKSSATVGPKAPAVGK	SSATVGPKA	8.15097e+08	1.18641e+09	7.74753e+08	8.5435e+08	8.1137e+08	2.73948e+08	3.03469e+08	9.07653e+08	4.62929e+08	0.510028	13624	3926
tr|F8WIX8|F8WIX8_MOUSE Histone H2A OS=Mus musculus GN=Hist1h2al PE=3 SV=1	VLPNIQAVLLPKKTESHHKAKGK	VLPNIQAVL	1.42941e+09	5.70514e+08	1286727500	7.75838e+08	9.26379e+08	598691600	714440600	1.01562e+09	7.46504e+08	0.735022	35365	24572
